# Supplementary material for: Improved survival among colon cancer patients with increased differentially expressed pathways
Source: Springer Nature journal article supplement (doi:10.1186/s12916-015-0292-9), 2015-04-07
Supplement: MOESM4 [file 9758734]

# Kaplan-Meier Survival Estimates for Cell Cycle Control of Chromosomal Replication

With 95% Confidence Limits

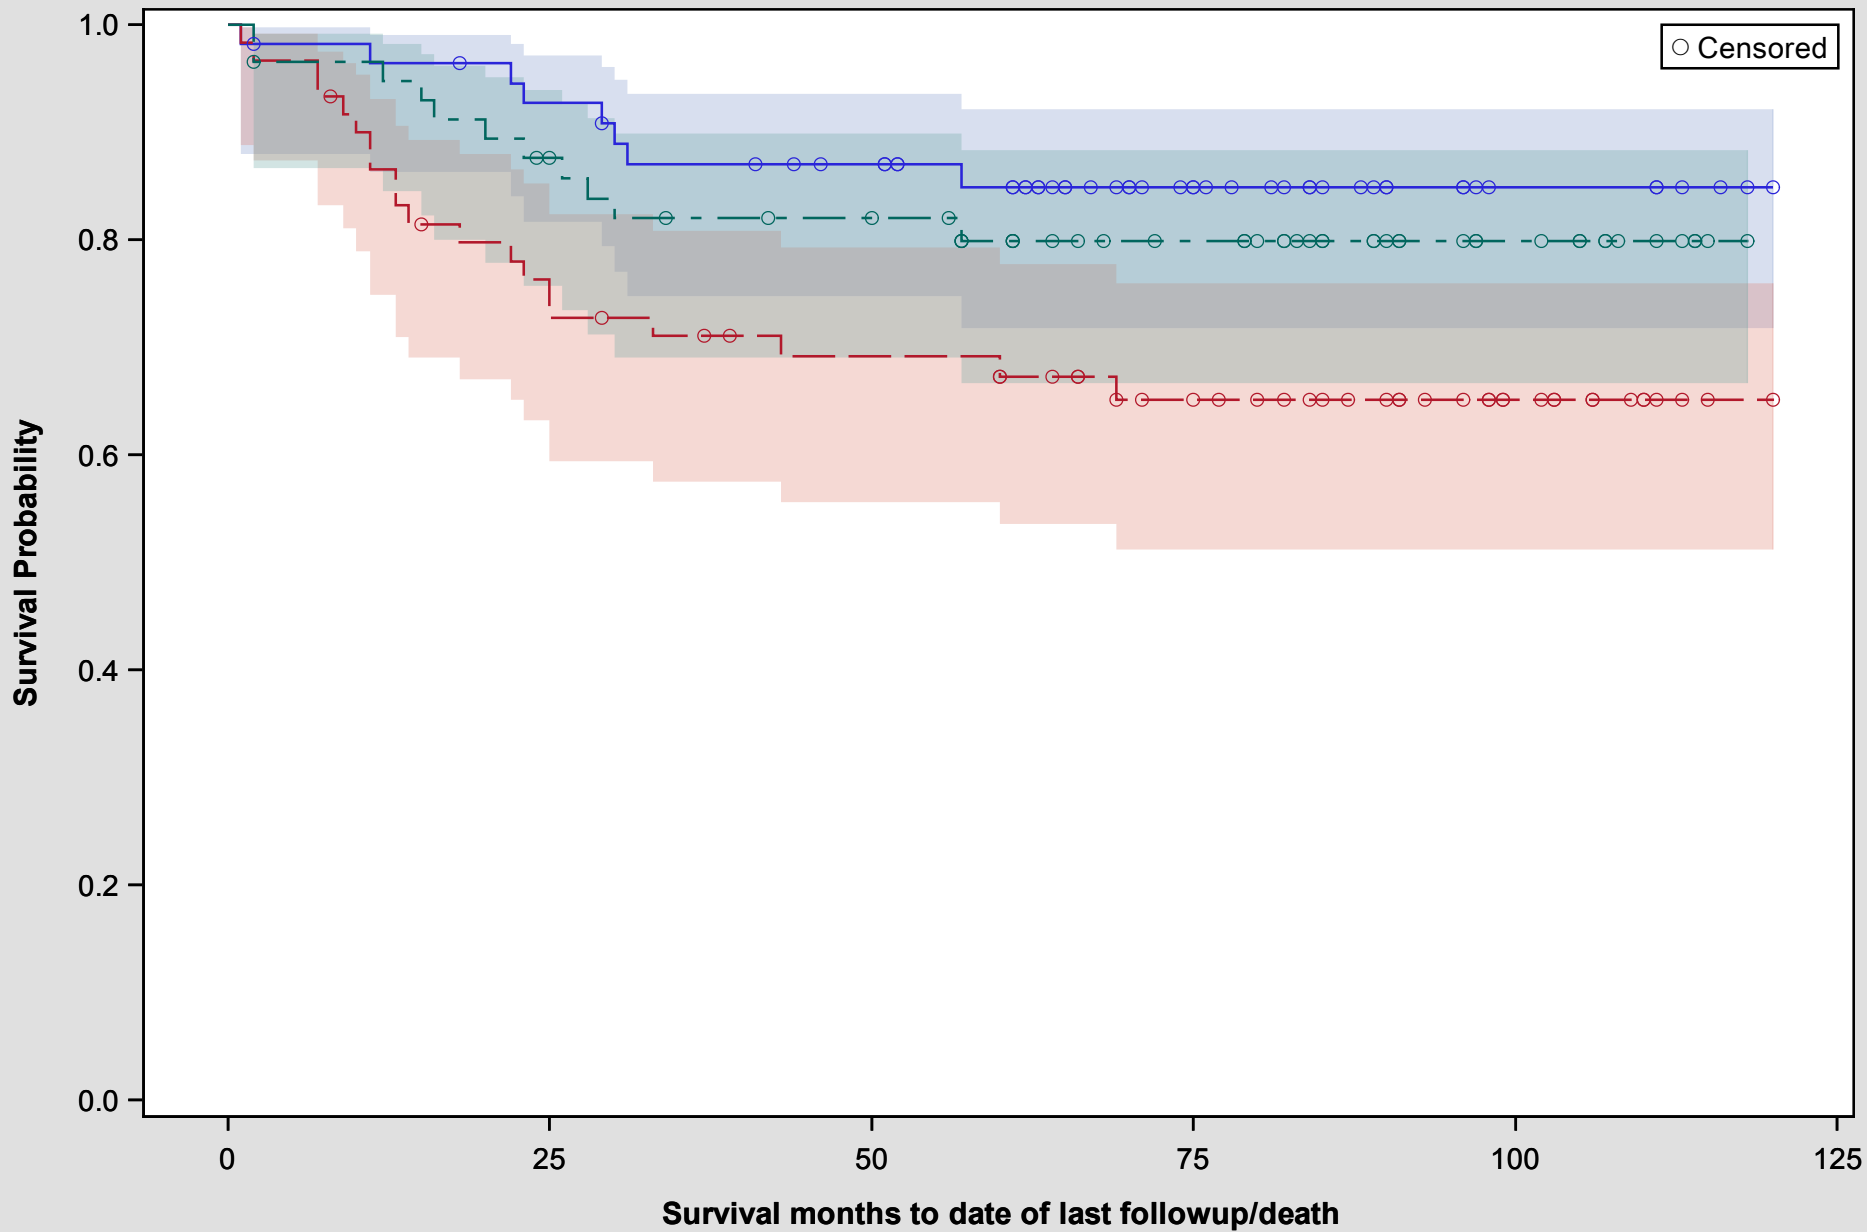

Differential Pathway Expression Score    — Highest Tertile    — Middle Tertile    — Lowest Tertile
